# Supplementary material
Source: ML conference proceedings conference paper supplement (https://www.ecva.net/papers/eccv_2022/papers_ECCV/html/136840176_ECCV_2022_paper.php)
Supplement: Supplementary file 1 [file 136840176-supp.pdf]

## Appendix A. Detailed Derivations and Proofs for Sec. 3.1 & 3.2

### A.1 Details for Sec. 3.1

To better present our proposed vMF classifier, we formulate Eq. 2 in submission PDF equivalently as:

$$\begin{aligned}
 p_i^l &= \frac{p_{\mathcal{D}}^{tra}(i) \cdot p(\tilde{\mathbf{x}}^l | \kappa_i, \tilde{\boldsymbol{\mu}}_i)}{\sum_{j=1}^C p_{\mathcal{D}}^{tra}(j) \cdot p(\tilde{\mathbf{x}}^l | \kappa_j, \tilde{\boldsymbol{\mu}}_j)} \\
 &= \frac{\exp\left\{ \underbrace{\kappa_i \cdot \tilde{\mathbf{x}}^l \tilde{\boldsymbol{\mu}}_i^\top + \left(\frac{d}{2} - 1\right) \cdot \log \kappa_i - \log I_{\frac{d}{2}-1}(\kappa_i)}_{\text{denoted as } b_i} + \underbrace{\log n_i}_{\text{prior}} \right\}}{\sum_{j=1}^C \exp\left\{ \underbrace{\kappa_j \cdot \tilde{\mathbf{x}}^l \tilde{\boldsymbol{\mu}}_j^\top + \left(\frac{d}{2} - 1\right) \cdot \log \kappa_j - \log I_{\frac{d}{2}-1}(\kappa_j)}_{\text{denoted as } b_j} + \underbrace{\log n_j}_{\text{prior}} \right\}}. \tag{1}
 \end{aligned}$$

Based on Eq. 1 in Appendix, we calculate the derivative of  $p_i^l$  with respect to  $\kappa_i$  as:

$$\begin{aligned}
 \frac{\partial p_i^l}{\partial \kappa_i} &= \frac{\partial p_i^l}{\partial(\kappa_i \cdot \tilde{\mathbf{x}}^l \tilde{\boldsymbol{\mu}}_i^\top + b_i)} \cdot \left( \frac{\partial(\kappa_i \cdot \tilde{\mathbf{x}}^l \tilde{\boldsymbol{\mu}}_i^\top)}{\partial \kappa_i} + \frac{\partial b_i}{\partial \kappa_i} \right) \\
 &= (1 - p_i^l) \cdot (\tilde{\mathbf{x}}^l \tilde{\boldsymbol{\mu}}_i^\top - A_d(\kappa_i)), \tag{2}
 \end{aligned}$$

where  $A_d(\kappa_i) = I_{d/2}(\kappa_i)/I_{d/2-1}(\kappa_i)$ . The derivative of  $p_i^l$  with respect to  $\kappa_j$  is calculated as:

$$\begin{aligned}
 \frac{\partial p_i^l}{\partial \kappa_j} &= \frac{\partial p_i^l}{\partial(\kappa_j \cdot \tilde{\mathbf{x}}^l \tilde{\boldsymbol{\mu}}_j^\top + b_j)} \cdot \left( \frac{\partial(\kappa_j \cdot \tilde{\mathbf{x}}^l \tilde{\boldsymbol{\mu}}_j^\top)}{\partial \kappa_j} + \frac{\partial b_j}{\partial \kappa_j} \right) \\
 &= -p_j^l \cdot (\tilde{\mathbf{x}}^l \tilde{\boldsymbol{\mu}}_j^\top - A_d(\kappa_j)). \tag{3}
 \end{aligned}$$

The derivatives of  $p_i^l$  with respect to  $\tilde{\boldsymbol{\mu}}_i$  and  $\tilde{\boldsymbol{\mu}}_j$  are formulated as:

$$\begin{aligned}
 \frac{\partial p_i^l}{\partial \tilde{\boldsymbol{\mu}}_i} &= \frac{\partial p_i^l}{\partial(\kappa_i \cdot \tilde{\mathbf{x}}^l \tilde{\boldsymbol{\mu}}_i^\top)} \cdot \frac{\partial(\kappa_i \cdot \tilde{\mathbf{x}}^l \tilde{\boldsymbol{\mu}}_i^\top)}{\partial \tilde{\boldsymbol{\mu}}_i} = (1 - p_i^l) \cdot \kappa_i \cdot \tilde{\mathbf{x}}^l \\
 \frac{\partial p_i^l}{\partial \tilde{\boldsymbol{\mu}}_j} &= \frac{\partial p_i^l}{\partial(\kappa_j \cdot \tilde{\mathbf{x}}^l \tilde{\boldsymbol{\mu}}_j^\top)} \cdot \frac{\partial(\kappa_j \cdot \tilde{\mathbf{x}}^l \tilde{\boldsymbol{\mu}}_j^\top)}{\partial \tilde{\boldsymbol{\mu}}_j} = -p_j^l \cdot \kappa_j \cdot \tilde{\mathbf{x}}^l. \tag{4}
 \end{aligned}$$

**Implement Details.** Both forward and backward operations with respect to  $b_i$  are **not supported** by **Pytorch** [3] framework. In addition, the floating point precision for  $I_v(\kappa)$  with the large  $v$  and small  $\kappa$  (e.g.,  $v = 511$  and  $\kappa = 16$ ) exceeds *float64* which is the maximum floating point precision of **CUDA**. While the floating point precision for  $\log I_v(\kappa)$  is in the normal interval.

To implement our method, we first calculate  $b_i$  and its derivative by **mp-math** [1] library which allows the floating pointing operation with arbitrary precision. Then, we convert them to the data type of **Pytorch**. Here is our core code for the above steps:

```

1 import mpmath as mp
2 import numpy as np
3 import torch
4 Iv = np.frompyfunc(mp.besseli, 2, 1) # Bessel Function I_v()
5 log = np.frompyfunc(mp.log, 1, 1) # Logarithmic Function
6 # Forward and backward functions for b_i
7 class Function_Bias(torch.autograd.Function):
8     @staticmethod
9     def forward(self, d, kappa):
10         self.k = kappa.data.cpu().numpy()
11         self.v = d / 2 - 1
12         bias = self.v * log(self.k) - log(Iv(self.v, self.k))
13         bias = torch.Tensor([float(bias)]).type_as(kappa)
14         self.save_for_backward(kappa)
15         return bias
16     @staticmethod
17     def backward(self, grad_output):
18         kappa = self.saved_tensors[-1]
19         Adk = Iv(self.v+1, self.k) / Iv(self.v, self.k)
20         Adk = torch.Tensor([float(Adk)]).type_as(kappa)
21         return None, - grad_output * Adk

```

See core code in supplement material for more implement details.

## A.2 Details for Sec. 3.2

For simplification, we abbreviate  $o_\Lambda(\kappa_i, \kappa_j, \tilde{\boldsymbol{\mu}}_i, \tilde{\boldsymbol{\mu}}_j)$  as  $o_\Lambda$ . To better present the distribution overlap coefficient, we formulate Eq. 6 in submission PDF equivalently as:

$$\begin{aligned}
 KL_{ij} &= \ln \frac{C_d(\kappa_i)}{C_d(\kappa_j)} + A_d(\kappa_i) \cdot (\kappa_i - \kappa_j \cdot \tilde{\boldsymbol{\mu}}_i \tilde{\boldsymbol{\mu}}_j^\top) \\
 &= b_i - b_j + A_d(\kappa_i) \cdot (\kappa_i - \kappa_j \cdot \tilde{\boldsymbol{\mu}}_i \tilde{\boldsymbol{\mu}}_j^\top).
 \end{aligned} \tag{5}$$

The derivatives of  $o_\Lambda$  with respect to  $\kappa_i$  and  $\kappa_j$  are formulated as:

$$\begin{aligned}
 \frac{\partial o_\Lambda}{\partial \kappa_i} &= \frac{\partial o_\Lambda}{\partial KL_{ij}} \cdot \frac{\partial KL_{ij}}{\partial \kappa_i} = o_\Lambda^2 \cdot \frac{\partial A_d(\kappa_i)}{\partial \kappa_i} \cdot (-\kappa_i + \kappa_j \cdot \tilde{\boldsymbol{\mu}}_i \tilde{\boldsymbol{\mu}}_j^\top) \\
 \frac{\partial o_\Lambda}{\partial \kappa_j} &= \frac{\partial o_\Lambda}{\partial KL_{ij}} \cdot \frac{\partial KL_{ij}}{\partial \kappa_j} = o_\Lambda^2 \cdot (-A_d(\kappa_j) + A_d(\kappa_i) \cdot \tilde{\boldsymbol{\mu}}_i \tilde{\boldsymbol{\mu}}_j^\top),
 \end{aligned} \tag{6}$$

where the derivative of  $A_d(\kappa_i)$  with respect to  $\kappa_i$  is defined as:

$$\frac{\partial A_d(\kappa_i)}{\partial \kappa_i} = 1 - \frac{d-1}{\kappa_i} \cdot A_d(\kappa_i) - A_d^2(\kappa_i). \tag{7}$$

The derivatives with respect to  $\tilde{\boldsymbol{\mu}}_i$  and  $\tilde{\boldsymbol{\mu}}_j$  are easily derived, following the above operations. The results are demonstrated in Tab. 1 of the submission PDF. **Implement Details.** Facing the same case as  $b_i$ , we need to define the forward and backward functions of  $A_d(\kappa_i)$  manually. The core code is demonstrated as:

```

1 import mpmath as mp
2 import numpy as np
3 import torch
4 Iv = np.frompyfunc(mp.besseli, 2, 1) # Bessel Function I_v()
5 # Forward and backward functions for A_d(\kappa)
6 class Function_Adk(torch.autograd.Function):
7     @staticmethod
8     def forward(self, d, kappa):
9         k = kappa.data.cpu().numpy()
10        self.d, v = d, d / 2 - 1
11        Adk = Iv(v+1, k) / Iv(v, k)
12        Adk = torch.Tensor([float(Adk)]).type_as(kappa)
13        self.save_for_backward(kappa, Adk)
14        return Adk
15    @staticmethod
16    def backward(self, grad_output):
17        kappa, Adk = self.saved_tensors
18        grad_Adk = 1 - (self.d - 1) / kappa * Adk - Adk ** 2
19        return None, grad_output * grad_Adk

```

## Appendix B. Relation with Other classifiers

### B.1 Balanced Cosine Classifier

Setting  $\kappa_i = \text{const } \sigma, \forall i \in [1, C]$ , Eq. 2 in submission PDF can be re-write as:

$$\begin{aligned}
 p_i^l &= \frac{p_{\mathcal{D}}^{\text{tra}}(i) \cdot p(\tilde{\mathbf{x}}^l | \sigma, \tilde{\boldsymbol{\mu}}_i)}{\sum_{j=1}^C p_{\mathcal{D}}^{\text{tra}}(j) \cdot p(\tilde{\mathbf{x}}^l | \sigma, \tilde{\boldsymbol{\mu}}_j)} \\
 &= \frac{n_i \cdot \exp\{\sigma \cdot \tilde{\mathbf{x}}^l \tilde{\boldsymbol{\mu}}_i^\top\}}{\sum_{j=1}^C n_j \cdot \exp\{\sigma \cdot \tilde{\mathbf{x}}^l \tilde{\boldsymbol{\mu}}_j^\top\}}.
 \end{aligned} \tag{8}$$

Consequently, the balanced cosine classifier can be considered a special case of our vMF classifier.

### B.2 Convert Other Classifiers into Ours

In this paper, we take three classifiers into account, including linear,  $\tau$ -norm, and causal classifiers, following the default setting (i.e., ignoring the bias terms). To measure the distribution overlap coefficient of them above, we develop a conversion method to convert them in a vMF classifier way.

For the linear classifier, given a feature vector  $\mathbf{x} \in \mathbb{R}^{1 \times d}$  and classifier weights  $\mathbf{W}^{\text{lin}} = \{\mathbf{w}_1^{\text{lin}}, \dots, \mathbf{w}_i^{\text{lin}}, \dots, \mathbf{w}_C^{\text{lin}}\} \in \mathbb{R}^{C \times d}$ , the score for class  $i$  can be defined as:

$$s_i^{\text{lin}} = \mathbf{w}_i^{\text{lin}} \mathbf{x}^\top = \underbrace{\|\mathbf{w}_i^{\text{lin}}\|_2}_{\text{compactness}} \cdot \overbrace{\frac{\mathbf{w}_i^{\text{lin}}}{\|\mathbf{w}_i^{\text{lin}}\|_2}}^{\text{orientation}} \mathbf{x}^\top. \tag{9}$$

For the  $\tau$ -norm classifier, given a feature vector  $\mathbf{x} \in \mathbb{R}^{1 \times d}$  and classifier weights  $\mathbf{W}^\tau = \{\mathbf{w}_1^\tau, \dots, \mathbf{w}_i^\tau, \dots, \mathbf{w}_C^\tau\} \in \mathbb{R}^{C \times d}$ , the score for class  $i$  can be defined as:

$$s_i^\tau = \frac{\mathbf{w}_i^\tau}{\|\mathbf{w}_i^\tau\|_2} \tilde{\mathbf{x}}^\top = \underbrace{\|\mathbf{w}_i^\tau\|_2^{1-\tau}}_{compactness} \cdot \overbrace{\frac{\mathbf{w}_i^\tau}{\|\mathbf{w}_i^\tau\|_2}}^{orientation} \tilde{\mathbf{x}}^\top. \quad (10)$$

For the causal classifier, given a feature vector  $\mathbf{x} \in \mathbb{R}^{1 \times d}$  and classifier weights  $\mathbf{W}^{cau} = \{\mathbf{w}_1^{cau}, \dots, \mathbf{w}_i^{cau}, \dots, \mathbf{w}_C^{cau}\} \in \mathbb{R}^{C \times d}$ , the score for class  $i$  can be defined as:

$$s_i^{cau} = \frac{\mathbf{w}_i^{cau}}{\|\mathbf{w}_i^{cau}\|_2 + \gamma} \tilde{\mathbf{x}}^\top = \underbrace{\frac{\|\mathbf{w}_i^{cau}\|_2}{\|\mathbf{w}_i^{cau}\|_2 + \gamma}}_{compactness} \cdot \overbrace{\frac{\mathbf{w}_i^{cau}}{\|\mathbf{w}_i^{cau}\|_2}}^{orientation} \tilde{\mathbf{x}}^\top. \quad (11)$$

In our experiment, the optimal setting  $\tau$  of  $\tau$ -norm classifier [2] is equal to 0.7.  $\gamma$  of the causal classifier [4] is set as 1/16, following the official codes. For the causal classifier, we do not apply the causal post-processing algorithm proposed by them. In addition, our ablation study on post-training calibration algorithm with different classifiers is shown in Tab. 4 of submission PDF.

## References

1. Johansson, F., et al.: mpmath: a Python library for arbitrary-precision floating-point arithmetic (version 0.18) (December 2013)
2. Kang, B., Xie, S., Rohrbach, M., Yan, Z., Gordo, A., Feng, J., Kalantidis, Y.: Decoupling representation and classifier for long-tailed recognition (2019)
3. Paszke, A., Gross, S., Chintala, S., Chanan, G., Yang, E., DeVito, Z., Lin, Z., Desmaison, A., Antiga, L., Lerer, A.: Automatic differentiation in pytorch (2017)
4. Tang, K., Huang, J., Zhang, H.: Long-tailed classification by keeping the good and removing the bad momentum causal effect. In: NeurIPS (2020)
